# Supplementary material for: Ionic liquid modified magnetic microspheres for isolation of heme protein with high binding capacity
Source: Royal Society of Chemistry journal article supplement (doi:10.1039/c3tb00576c), 2013-01-01
Supplement: c3tb00576c.pdf [file c3tb00576c.pdf]

# Supporting Information

## Ionic Liquid Modified Magnetic Microspheres for Isolation of Heme Protein with High Binding Capacity

**Yun Wei\***, Yan Li, Ailin Tian, Yuntian Fan, Xiong Wang

*State Key Laboratory of Chemical Resource Engineering, Beijing University of Chemical Technology, 15 Beisanhuan East Road, Chaoyang District, Beijing 100029, China. Tel & Fax: 0086 10 64442928. E-mail: [weiyun@mail.buct.edu.cn](mailto:weiyun@mail.buct.edu.cn)*

### Supplementary Figures

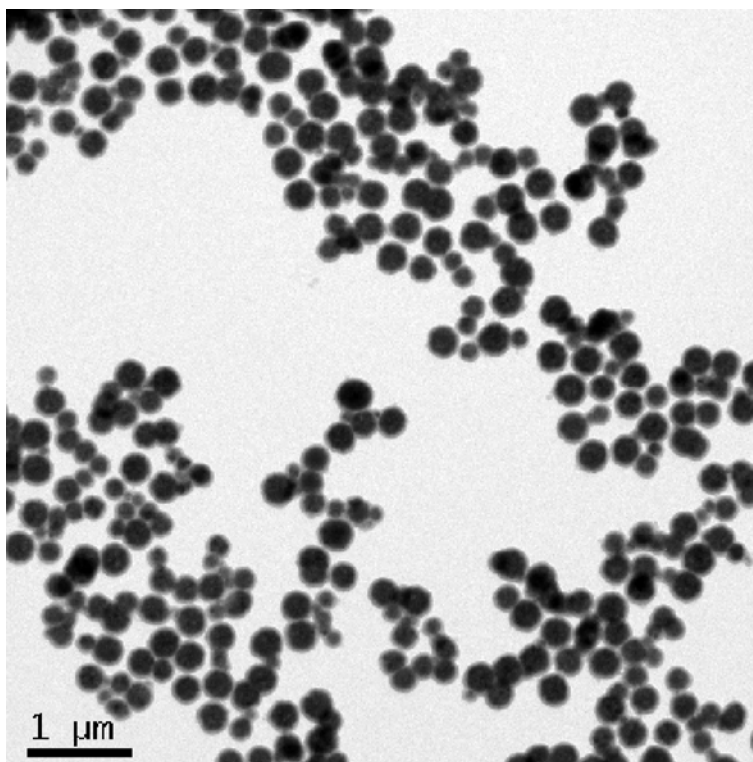

**Figure S1.** TEM images of Fe<sub>3</sub>O<sub>4</sub>@SiO<sub>2</sub> microspheres.

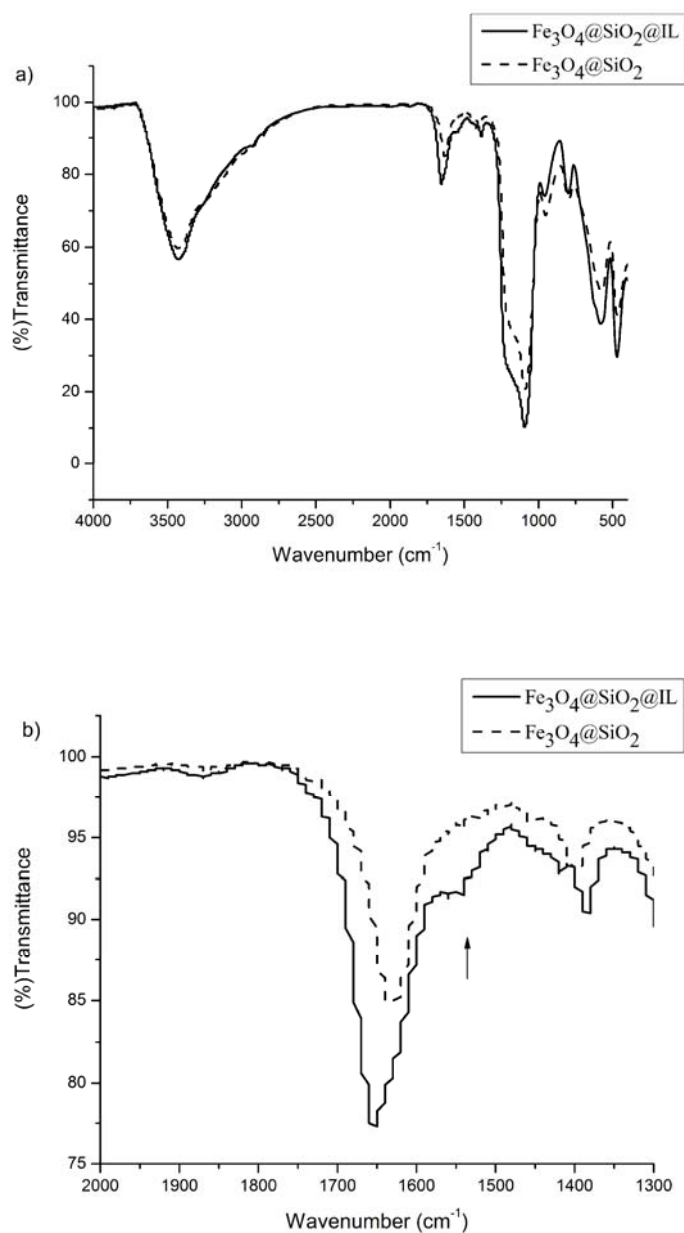

**Figure S2.** a) The FT-IR spectra of Fe<sub>3</sub>O<sub>4</sub>@SiO<sub>2</sub> and Fe<sub>3</sub>O<sub>4</sub>@SiO<sub>2</sub>@IL. b) The FT-IR spectra of Fe<sub>3</sub>O<sub>4</sub>@SiO<sub>2</sub> and Fe<sub>3</sub>O<sub>4</sub>@SiO<sub>2</sub>@IL from 1300 cm<sup>-1</sup> to 2000 cm<sup>-1</sup>. Small differences in spectra were observed in relation to the wavenumbers and intensities of the absorption bands for Fe<sub>3</sub>O<sub>4</sub>@SiO<sub>2</sub> and Fe<sub>3</sub>O<sub>4</sub>@SiO<sub>2</sub>@IL. In spectrum of Fe<sub>3</sub>O<sub>4</sub>@SiO<sub>2</sub>@IL functionalized silica, one important band at 1540 cm<sup>-1</sup> is attributed to the characteristic frequencies of cationic imidazole group.

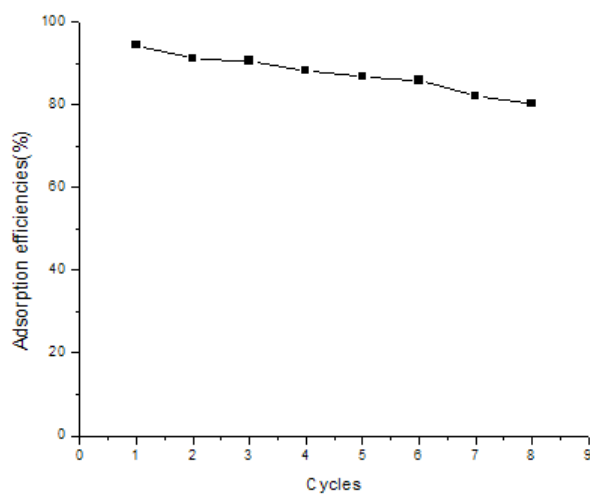

**Figure S3.** Recycled use of the IL resin for Hb adsorption.

The result of recycle experiment was shown in Fig.S3. The experiment condition is same as experiment 3.3.1 in this paper, pH 6.8. Compared to the actual bioseparations, sample concentration is very high. But the adsorption efficiencies maintained at more than 80% after 8 recycled use. So our resin would have a relatively long lifetime in the practical application.

**Table S1.** The separation efficiency of the IL resin compare to some commercial resins.

| resin                                                            | Separation<br>time | capacity                 | size    | company |
|------------------------------------------------------------------|--------------------|--------------------------|---------|---------|
| HIS-Select nickel magnetic beads <sup>1</sup>                    | 30 min             | >10 mg/g                 | 20-75µm | Sigma   |
| Glutathione High Capacity<br>Magnetic Agarose Beads <sup>2</sup> | 30min              | ≥12 mg/g                 | 50µm    | Sigma   |
| MagPrep <sup>®</sup> P-25 Protein A Particles <sup>3</sup>       |                    | > 220 µg human<br>IgG/mg | 25nm    | Novagen |
| Ni-NTA magnetic agarose beads <sup>4</sup>                       | 30min              | 0.25-1 mg/g              | 20-70µm | QIAGEN  |
| IL resin (This work)                                             | 15min              | 2.15 g Hb per g<br>resin | ~270nm  |         |

**Table S2.** The comparison of size, molecular weight and maximum adsorption number between Hb and Lys.

| protein | Size<br>(dimensions)        | molecular weight | maximum<br>adsorption number |
|---------|-----------------------------|------------------|------------------------------|
| Hb      | 5.3×5.4×6.5 nm <sup>5</sup> | 64500            | 3.33×10 <sup>-5</sup> mol/g  |
| Lys     | 3.0×3.0×4.5 nm <sup>6</sup> | 14388            | 1.39×10 <sup>-6</sup> mol/g  |

Seen from the table 1 below, the gap of size is not conspicuous relative to molecular weight. But the magnitude of adsorption number is different, which proved the selective affinities for hemoglobin.

## References

- 1 <http://www.sigmaaldrich.com/catalog/product/sigma/h9914?lang=en&region=CA>
- 2 <http://www.sigmaaldrich.com/catalog/product/sigma/g0924?lang=en&region=CA>.
- 3 [http://www.merckmillipore.com/china/life-science-research/magprep-p-25-protein-a-p/articles/EMD\\_BIO-72189/english/p\\_uDGb.s1O2tQAAAEjYRp9.zLX?WFSimpleSearch\\_NameOrID=+beads&BackButtonText=search+results](http://www.merckmillipore.com/china/life-science-research/magprep-p-25-protein-a-p/articles/EMD_BIO-72189/english/p_uDGb.s1O2tQAAAEjYRp9.zLX?WFSimpleSearch_NameOrID=+beads&BackButtonText=search+results)
- 4 <http://www.qiagen.com/Products/Protein/Purification/QIAexpressProteinPurificationSystem/Ni-NTAMagneticAgaroseBeads.aspx?r=609>
- 5 (a) H. H. Weetall, *Appl. Biochem. Biotechnol*, 1993, **41**, 157;  
(b) I. Gill, *Chem. Mater*, 2001, **13**, 3404.
- 6 J. R. Lu, T. J. Su, B. J. Howlin, *J. Phys. Chem. B*, 1999, **103**, 5903.
